# Supplementary material for: Comparing circular and network buffers to examine the influence of land use on walking for leisure and errands
Source: PubMed Central journal article supplement (PMC2034381; doi:10.1186/1476-072x-6-41), 2007-09-20
Supplement: 1476-072X-6-41-S1.pdf [file 1476-072X-6-41-S1.pdf]

Additional file 1: Logistic regression models predicting 'walking for leisure 15 minutes or less per day' by land use characteristics assessed with 1km network and circular buffers

| Predictor variables                          | Model 1                    |             | Model 2                    |             |                    |             | Model 3             |             |                    |             |
|----------------------------------------------|----------------------------|-------------|----------------------------|-------------|--------------------|-------------|---------------------|-------------|--------------------|-------------|
|                                              | Individual characteristics |             | Recreational and park land |             |                    |             | Residential land    |             |                    |             |
|                                              | OR                         | 95% CI      | (a) Circular Buffer        |             | (b) Network Buffer |             | (a) Circular Buffer |             | (b) Network Buffer |             |
|                                              | OR                         | 95% CI      | OR                         | 95% CI      | OR                 | 95% CI      | OR                  | 95% CI      | OR                 | 95% CI      |
| <i>Individual characteristics</i>            |                            |             |                            |             |                    |             |                     |             |                    |             |
| Age                                          | 1.00                       | (0.99,1.01) | 1.00                       | (0.99,1.01) | 1.00               | (0.99,1.01) | 1.00                | (0.99,1.01) | 1.00               | (0.98,1.01) |
| Female (vs. male)                            | 0.65*                      | (0.50,0.82) | 0.65*                      | (0.51,0.83) | 0.65*              | (0.51,0.83) | 0.65*               | (0.51,0.83) | 0.65*              | (0.51,0.83) |
| Chronic condition                            | 0.97                       | (0.74,1.26) | 0.97                       | (0.74,1.26) | 0.97               | (0.75,1.26) | 0.98                | (0.75,1.28) | 0.98               | (0.76,1.28) |
| Body Mass Index                              | 1.03*                      | (1.01,1.05) | 1.03*                      | (1.01,1.05) | 1.03*              | (1.01,1.05) | 1.03*               | (1.01,1.05) | 1.03*              | (1.01,1.05) |
| Low income (vs. mid income)                  | 1.22                       | (0.90,1.66) | 1.22                       | (0.90,1.65) | 1.23               | (0.91,1.67) | 1.22                | (0.90,1.65) | 1.22               | (0.90,1.65) |
| High income (vs. mid income)                 | 1.15                       | (0.86,1.54) | 1.16                       | (0.87,1.56) | 1.15               | (0.86,1.54) | 1.16                | (0.87,1.54) | 1.14               | (0.86,1.53) |
| Single<br>(vs. married/common law)           | 0.99                       | (0.71,1.38) | 0.99                       | (0.71,1.38) | 0.99               | (0.71,1.38) | 0.99                | (0.71,1.37) | 0.99               | (0.71,1.38) |
| Divorced/widowed<br>(vs. married/common law) | 0.96                       | (0.64,1.45) | 0.97                       | (0.65,1.47) | 0.97               | (0.65,1.46) | 0.97                | (0.64,1.46) | 0.98               | (0.65,1.48) |
| <i>Land use characteristics</i>              |                            |             |                            |             |                    |             |                     |             |                    |             |
| Park and recreational land %                 |                            |             | 0.51                       | (0.08,3.22) | 0.23               | (0.01,7.50) |                     |             |                    |             |
| Residential land %                           |                            |             |                            |             |                    |             | 1.29                | (0.67,2.49) | 1.52               | (0.90,2.57) |
| Commercial land %                            |                            |             |                            |             |                    |             |                     |             |                    |             |
| Institutional land %                         |                            |             |                            |             |                    |             |                     |             |                    |             |
| <b>Model Fit Statistic</b>                   |                            |             |                            |             |                    |             |                     |             |                    |             |
| -2 Log Likelihood                            | 1590.02                    |             | 1589.51                    |             | 1589.32            |             | 1589.42             |             | 1587.48            |             |

\*p<0.05

Additional file 1: (cont'd) Logistic regression models predicting 'walking for leisure 15 minutes or less per day' by land use characteristics assessed with 1km network and circular buffers

| Predictor variables               | Model 4             |             |                    |             | Model 5             |             |                    |             |
|-----------------------------------|---------------------|-------------|--------------------|-------------|---------------------|-------------|--------------------|-------------|
|                                   | Commercial land     |             |                    |             | Institutional land  |             |                    |             |
|                                   | (a) Circular Buffer |             | (b) Network Buffer |             | (a) Circular Buffer |             | (b) Network Buffer |             |
|                                   | OR                  | 95% CI      | OR                 | 95% CI      | OR                  | 95% CI      | OR                 | 95% CI      |
| <i>Individual characteristics</i> |                     |             |                    |             |                     |             |                    |             |
| Age                               | 1.00                | (0.98,1.01) | 1.00               | (0.98,1.01) | 1.00                | (0.99,1.01) | 1.00               | (0.99,1.01) |
| Female (vs. male)                 | 0.64*               | (0.50,0.82) | 0.64*              | (0.50,0.82) | 0.65*               | (0.51,0.83) | 0.65*              | (0.51,0.83) |
| Chronic condition                 | 0.97                | (0.75,1.27) | 0.97               | (0.75,1.27) | 0.97                | (0.74,1.26) | 0.96               | (0.74,1.25) |
| Body Mass Index                   | 1.03*               | (1.01,1.05) | 1.03*              | (1.01,1.05) | 1.03*               | (1.01,1.05) | 1.03*              | (1.01,1.05) |
| Low income (vs. mid income)       | 1.24                | (0.91,1.68) | 1.25               | (0.91,1.68) | 1.19                | (0.88,1.61) | 1.18               | (0.87,1.60) |
| High income (vs. mid income)      | 1.14                | (0.85,1.52) | 1.13               | (0.85,1.52) | 1.16                | (0.87,1.55) | 1.14               | (0.85,1.52) |
| Single                            |                     |             |                    |             |                     |             |                    |             |
| (vs. married/common law)          | 1.00                | (0.72,1.39) | 1.00               | (0.72,1.39) | 0.99                | (0.71,1.38) | 1.00               | (0.71,1.39) |
| Divorced/widowed                  |                     |             |                    |             |                     |             |                    |             |
| (vs. married/common law)          | 0.97                | (0.65,1.46) | 0.98               | (0.65,1.46) | 0.97                | (0.65,1.47) | 0.98               | (0.65,1.48) |
| <i>Land use characteristics</i>   |                     |             |                    |             |                     |             |                    |             |
| Park and recreational land %      |                     |             |                    |             |                     |             |                    |             |
| Residential land %                |                     |             |                    |             |                     |             |                    |             |
| Commercial land %                 | 0.52                | (0.08,3.48) | 0.48               | (0.08,3.48) |                     |             |                    |             |
| Institutional land %              |                     |             |                    |             | 0.07                | (0.00,1.12) | 0.03*              | (0.00,0.33) |
| <b>Model Fit Statistic</b>        |                     |             |                    |             |                     |             |                    |             |
| -2 Log Likelihood                 | 1589.56             |             | 1588.85            |             | 1586.38             |             | 1581.40            |             |

\*p<0.05
