# Supplementary material for: Comparing circular and network buffers to examine the influence of land use on walking for leisure and errands
Source: PubMed Central journal article supplement (PMC2034381; doi:10.1186/1476-072x-6-41), 2007-09-20
Supplement: 1476-072X-6-41-S2.pdf [file 1476-072X-6-41-S2.pdf]

Additional file 2: Logistic regression models predicting 'walking for errands less than 1 hour per week' by land use characteristics assessed with 1km network and circular buffers

| Predictor variables                          | Model 1                    |             | Model 2                    |             |                    |             | Model 3             |             |                    |             |
|----------------------------------------------|----------------------------|-------------|----------------------------|-------------|--------------------|-------------|---------------------|-------------|--------------------|-------------|
|                                              | Individual characteristics |             | Recreational and park land |             |                    |             | Residential land    |             |                    |             |
|                                              | OR                         | 95% CI      | (a) Circular Buffer        |             | (b) Network Buffer |             | (a) Circular Buffer |             | (b) Network Buffer |             |
|                                              | OR                         | 95% CI      | OR                         | 95% CI      | OR                 | 95% CI      | OR                  | 95% CI      | OR                 | 95% CI      |
| <i>Individual characteristics</i>            |                            |             |                            |             |                    |             |                     |             |                    |             |
| Age                                          | 1.00                       | (0.99,1.01) | 1.00                       | (0.99,1.01) | 1.00               | (0.99,1.01) | 1.00                | (0.99,1.01) | 1.00               | (0.98,1.01) |
| Female (vs. male)                            | 1.01                       | (0.80,1.27) | 1.01                       | (0.80,1.27) | 1.01               | (0.80,1.28) | 1.01                | (0.80,1.28) | 1.02               | (0.81,1.29) |
| Chronic condition                            | 0.85                       | (0.67,1.09) | 0.85                       | (0.67,1.09) | 0.86               | (0.67,1.09) | 0.87                | (0.68,1.11) | 0.88               | (0.69,1.13) |
| Body Mass Index                              | 1.02*                      | (1.00,1.05) | 1.02*                      | (1.00,1.05) | 1.03*              | (1.00,1.05) | 1.02*               | (1.00,1.05) | 1.03*              | (1.00,1.05) |
| Low income (vs. mid income)                  | 0.65*                      | (0.49,0.86) | 0.65*                      | (0.49,0.86) | 0.66*              | (0.50,0.87) | 0.64*               | (0.48,0.85) | 0.64*              | (0.48,0.85) |
| High income (vs. mid income)                 | 1.30                       | (0.99,1.69) | 1.30                       | (0.99,1.70) | 1.30*              | (1.00,1.70) | 1.30                | (1.00,1.70) | 1.28               | (0.98,1.67) |
| Single<br>(vs. married/common law)           | 0.85                       | (0.63,1.16) | 0.85                       | (0.63,1.16) | 0.86               | (0.63,1.17) | 0.85                | (0.62,1.15) | 0.86               | (0.63,1.17) |
| Divorced/widowed<br>(vs. married/common law) | 0.97                       | (0.67,1.41) | 0.97                       | (0.67,1.41) | 0.99               | (0.68,1.45) | 0.98                | (0.67,1.42) | 1.01               | (0.69,1.47) |
| <i>Land use characteristics</i>              |                            |             |                            |             |                    |             |                     |             |                    |             |
| Park and recreational land %                 |                            |             | 0.89                       | (0.16,4.83) | 0.02*              | (0.00,0.47) |                     |             |                    |             |
| Residential land %                           |                            |             |                            |             |                    |             | 1.55                | (0.85,2.82) | 2.46*              | (1.53,3.96) |
| Commercial land %                            |                            |             |                            |             |                    |             |                     |             |                    |             |
| Institutional land %                         |                            |             |                            |             |                    |             |                     |             |                    |             |
| <b>Model Fit Statistic</b>                   |                            |             |                            |             |                    |             |                     |             |                    |             |
| -2 Log Likelihood                            | 1782.10                    |             | 1782.08                    |             | 1776.16            |             | 1780.09             |             | 1768.22            |             |

\*p<0.05

Additional file 2: (cont'd) Logistic regression models predicting 'walking for errands less than 1 hour per week' by land use characteristics assessed with 1km network and circular buffers

| Predictor variables               | Model 4             |             |                    |             | Model 5             |             |                    |             |
|-----------------------------------|---------------------|-------------|--------------------|-------------|---------------------|-------------|--------------------|-------------|
|                                   | Commercial land     |             |                    |             | Institutional land  |             |                    |             |
|                                   | (a) Circular Buffer |             | (b) Network Buffer |             | (a) Circular Buffer |             | (b) Network Buffer |             |
|                                   | OR                  | 95% CI      | OR                 | 95% CI      | OR                  | 95% CI      | OR                 | 95% CI      |
| <i>Individual characteristics</i> |                     |             |                    |             |                     |             |                    |             |
| Age                               | 1.00                | (0.98,1.01) | 1.00               | (0.98,1.01) | 1.00                | (0.99,1.01) | 1.00               | (0.99,1.01) |
| Female (vs. male)                 | 0.97                | (0.77,1.23) | 0.98               | (0.77,1.23) | 1.02                | (0.81,1.28) | 1.02               | (0.81,1.28) |
| Chronic condition                 | 0.86                | (0.67,1.10) | 0.87               | (0.67,1.10) | 0.85                | (0.67,1.09) | 0.84               | (0.66,1.08) |
| Body Mass Index                   | 1.03*               | (1.00,1.05) | 1.03*              | (1.00,1.05) | 1.03*               | (1.00,1.05) | 1.03*              | (1.00,1.05) |
| Low income (vs. mid income)       | 0.70*               | (0.52,0.93) | 0.71*              | (0.52,0.93) | 0.63*               | (0.48,0.84) | 0.62*              | (0.47,0.83) |
| High income (vs. mid income)      | 1.16                | (0.88,1.52) | 1.19               | (0.88,1.52) | 1.31*               | (1.00,1.71) | 1.28               | (0.98,1.67) |
| Single                            |                     |             |                    |             |                     |             |                    |             |
| (vs. married/common law)          | 0.89                | (0.65,1.22) | 0.90               | (0.65,1.22) | 0.86                | (0.63,1.16) | 0.86               | (0.63,1.17) |
| Divorced/widowed                  |                     |             |                    |             |                     |             |                    |             |
| (vs. married/common law)          | 1.02                | (0.70,1.49) | 1.04               | (0.70,1.49) | 0.98                | (0.68,1.42) | 0.99               | (0.68,1.44) |
| <i>Land use characteristics</i>   |                     |             |                    |             |                     |             |                    |             |
| Park and recreational land %      |                     |             |                    |             |                     |             |                    |             |
| Residential land %                |                     |             |                    |             |                     |             |                    |             |
| Commercial land %                 | 0.01*               | (0.00,0.06) | 0.02*              | (0.00,0.06) |                     |             |                    |             |
| Institutional land %              |                     |             |                    |             | 0.12                | (0.01,1.44) | 0.04*              | (0.00,0.35) |
| <b>Model Fit Statistic</b>        |                     |             |                    |             |                     |             |                    |             |
| -2 Log Likelihood                 | 1755.77             |             | 1747.46            |             | 1779.28             |             | 1773.42            |             |

\*p<0.05
